# Supplementary material for: Estrogens Protect Calsequestrin‐1 Knockout Mice from Lethal Hyperthermic Episodes by Reducing Oxidative Stress in Muscle
Source: Hindawi journal article supplement (doi:10.1155/2017/6936897), 2017-01-01
Supplement: f1 [file 6936897.f1.cdr]

Archive with 15 entries (15 files):
- content/data/data1.dat
- content/data/masterPage.dat
- content/data/page1.dat
- content/dataFileList.dat
- content/root.dat
- metadata/thumbnails/thumbnail.bmp
- metadata/thumbnails/page1.bmp
- color/color.xml
- color/profiles/rgb/srgb color space profile.icm
- color/profiles/cmyk/isocoated_v2_eci.icc
- metadata/metadata.xml
- metadata/textinfo.xml
- color/docPalette.xml
- styles/document.cdss
- links.xml
