# Supplementary material for: Estrogens Protect Calsequestrin‐1 Knockout Mice from Lethal Hyperthermic Episodes by Reducing Oxidative Stress in Muscle
Source: Hindawi journal article supplement (doi:10.1155/2017/6936897), 2017-01-01
Supplement: f1 [file 6936897.f1.cdr › color/color.xml]

<Color><ColorContext><ColorProfile id="Rgb">sRGB IEC61966-2.1</ColorProfile><ColorProfile id="Cmyk">ISO Coated v2 (ECI)</ColorProfile><ColorProfile id="Grayscale">Dot Gain 15%</ColorProfile><ColorModel>Cmyk</ColorModel><RenderingIntent>RelativeColorimetric</RenderingIntent></ColorContext><HasRgbObjects>true</HasRgbObjects><HasCmykObjects>true</HasCmykObjects><HasGrayscaleObjects>false</HasGrayscaleObjects></Color>
