# Supplementary material for: Estrogens Protect Calsequestrin‐1 Knockout Mice from Lethal Hyperthermic Episodes by Reducing Oxidative Stress in Muscle
Source: Hindawi journal article supplement (doi:10.1155/2017/6936897), 2017-01-01
Supplement: f1 [file 6936897.f1.cdr › color/docPalette.xml]

<?xml version="1.0"?>
<palette guid="22ff31f5-022a-4b3c-a54c-12a47c9f678e" name="Tavolozza del documento"/>
