# Supplementary material for: Estrogens Protect Calsequestrin‐1 Knockout Mice from Lethal Hyperthermic Episodes by Reducing Oxidative Stress in Muscle
Source: Hindawi journal article supplement (doi:10.1155/2017/6936897), 2017-01-01
Supplement: f1 [file 6936897.f1.cdr › content/dataFileList.dat]

data1.dat
masterPage.dat
page1.dat
