# Supplementary material for: Estrogens Protect Calsequestrin‐1 Knockout Mice from Lethal Hyperthermic Episodes by Reducing Oxidative Stress in Muscle
Source: Hindawi journal article supplement (doi:10.1155/2017/6936897), 2017-01-01
Supplement: f1 [file 6936897.f1.cdr › metadata/textinfo.xml]

<?xml version="1.0" encoding="UTF-8" ?>
<x:xmpmeta xmlns:x="adobe:ns:meta/">
    <rdf:RDF xmlns:rdf="http://www.w3.org/1999/02/22-rdf-syntax-ns#">
        <rdf:Description rdf:about="" xmlns="http://namespace.corel.com/Cdr/metadata">
            <ObjectNames>
                <rdf:Bag />
            </ObjectNames>
            <LayerNames>
                <rdf:Bag>
                    <rdf:li>Livello 1</rdf:li>
                </rdf:Bag>
            </LayerNames>
            <PageNames>
                <rdf:Bag />
            </PageNames>
            <TextData>
                <TextStream>
                    <TextRun lang="1040" break="para">Time (min)</TextRun>
                </TextStream>
                <TextStream>
                    <TextRun lang="1040" break="para">60</TextRun>
                </TextStream>
                <TextStream>
                    <TextRun lang="1040" break="para">10-3</TextRun>
                </TextStream>
                <TextStream>
                    <TextRun lang="1040" break="para">10-5</TextRun>
                </TextStream>
                <TextStream>
                    <TextRun lang="1040" break="para">Females vs Females + Leu</TextRun>
                </TextStream>
                <TextStream>
                    <TextRun lang="1040" break="para">Males vs Males + Prem</TextRun>
                </TextStream>
                <TextStream>
                    <TextRun lang="1040" break="para">Males vs Females</TextRun>
                </TextStream>
                <TextStream>
                    <TextRun lang="1040" break="para">Threshold; p=0.05</TextRun>
                </TextStream>
                <TextStream>
                    <TextRun lang="1040" break="para">8</TextRun>
                </TextStream>
                <TextStream>
                    <TextRun lang="1040" break="para">6</TextRun>
                </TextStream>
                <TextStream>
                    <TextRun lang="1040" break="para">4</TextRun>
                </TextStream>
                <TextStream>
                    <TextRun lang="1040" break="para">2</TextRun>
                </TextStream>
                <TextStream>
                    <TextRun lang="1040" break="para">0</TextRun>
                </TextStream>
                <TextStream>
                    <TextRun lang="1040" break="para">p value</TextRun>
                </TextStream>
                <TextStream>
                    <TextRun lang="1040" break="para">1</TextRun>
                </TextStream>
                <TextStream>
                    <TextRun lang="1040" break="para">10-1</TextRun>
                </TextStream>
                <TextStream>
                    <TextRun lang="1040" break="para">10-2</TextRun>
                </TextStream>
                <TextStream>
                    <TextRun lang="1040" break="para">10-4</TextRun>
                </TextStream>
                <TextStream>
                    <TextRun lang="1040" break="para">Males (n=8)</TextRun>
                </TextStream>
                <TextStream>
                    <TextRun lang="1040" break="para">Males + Prem (n=8)</TextRun>
                </TextStream>
                <TextStream>
                    <TextRun lang="1040" break="para">Females + Leu (n=8)</TextRun>
                </TextStream>
                <TextStream>
                    <TextRun lang="1040" break="para">Females (n=8)</TextRun>
                </TextStream>
                <TextStream>
                    <TextRun lang="1040" break="para">60</TextRun>
                </TextStream>
                <TextStream>
                    <TextRun lang="1040" break="para">50</TextRun>
                </TextStream>
                <TextStream>
                    <TextRun lang="1040" break="para">40</TextRun>
                </TextStream>
                <TextStream>
                    <TextRun lang="1040" break="para">30</TextRun>
                </TextStream>
                <TextStream>
                    <TextRun lang="1040" break="para">20</TextRun>
                </TextStream>
                <TextStream>
                    <TextRun lang="1040" break="para">10</TextRun>
                </TextStream>
                <TextStream>
                    <TextRun lang="1040" break="para">0</TextRun>
                </TextStream>
                <TextStream>
                    <TextRun lang="1032" break="para">Δ</TextRun>
                    <TextRun lang="1040" break="none">T (°C)</TextRun>
                </TextStream>
                <TextStream>
                    <TextRun lang="1040" break="para">Time (min)</TextRun>
                </TextStream>
                <TextStream>
                    <TextRun lang="1040" break="para">B</TextRun>
                </TextStream>
                <TextStream>
                    <TextRun lang="1040" break="para">50</TextRun>
                </TextStream>
                <TextStream>
                    <TextRun lang="1040" break="para">40</TextRun>
                </TextStream>
                <TextStream>
                    <TextRun lang="1040" break="para">30</TextRun>
                </TextStream>
                <TextStream>
                    <TextRun lang="1040" break="para">20</TextRun>
                </TextStream>
                <TextStream>
                    <TextRun lang="1040" break="para">10</TextRun>
                </TextStream>
                <TextStream>
                    <TextRun lang="1040" break="para">0</TextRun>
                </TextStream>
                <TextStream>
                    <TextRun lang="1040" break="para">A</TextRun>
                </TextStream>
            </TextData>
        </rdf:Description>
    </rdf:RDF>
</x:xmpmeta>
