# Supplementary figures and images for: Estrogens Protect Calsequestrin‐1 Knockout Mice from Lethal Hyperthermic Episodes by Reducing Oxidative Stress in Muscle
Source: Hindawi journal article supplement (doi:10.1155/2017/6936897), 2017-01-01

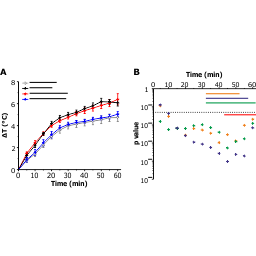

Supplement: f1 [file 6936897.f1.cdr › metadata/thumbnails/thumbnail.bmp]

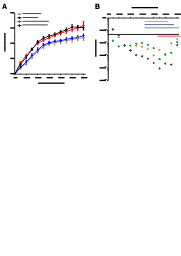

Supplement: f1 [file 6936897.f1.cdr › metadata/thumbnails/page1.bmp]
